# Supplementary material
Source: PubMed Central journal article supplement (PMC4611511)
Supplement: ismej201558x7.pdf [file ismej201558x7.pdf]

# Bacteria

# Fungi

Amplicon  
(454 technology)

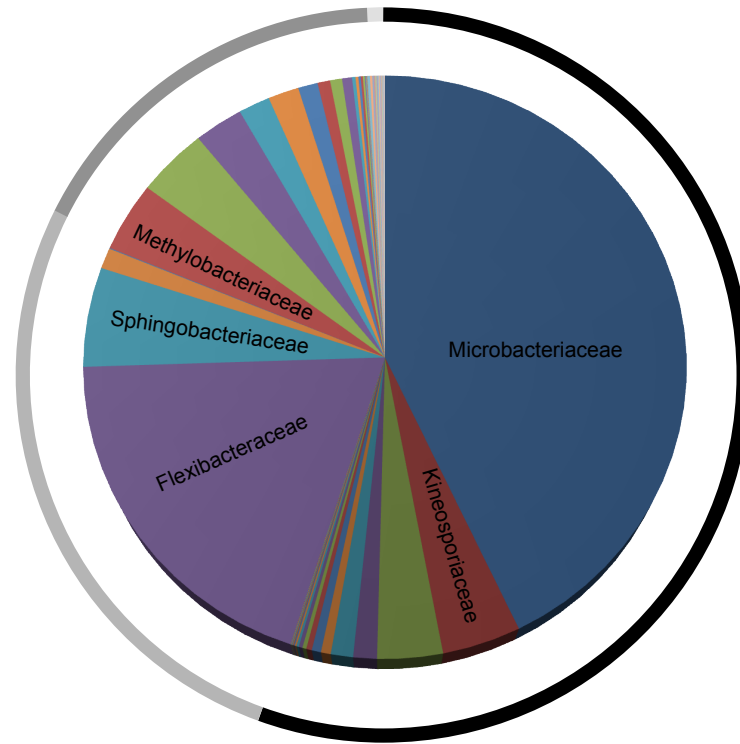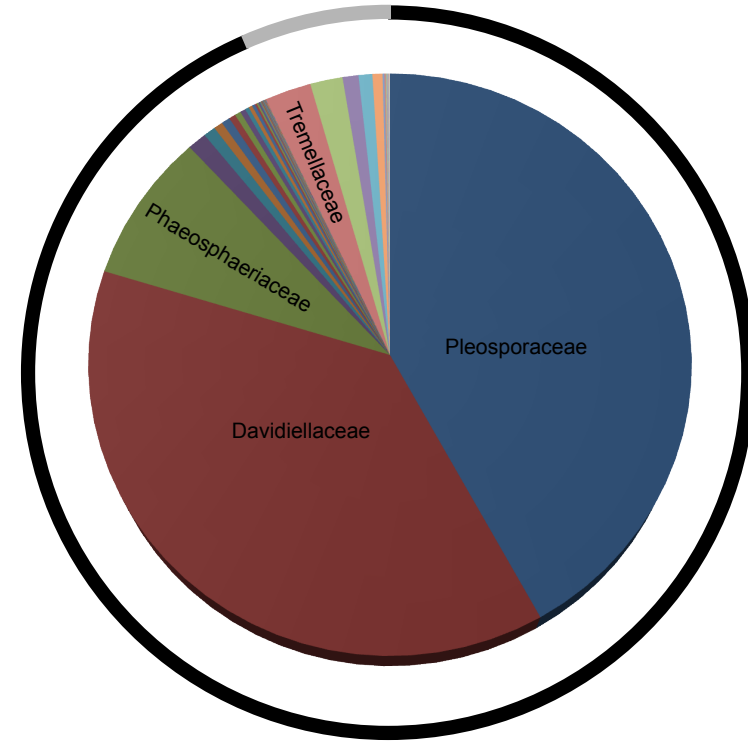

Metagenome  
(Illumina)

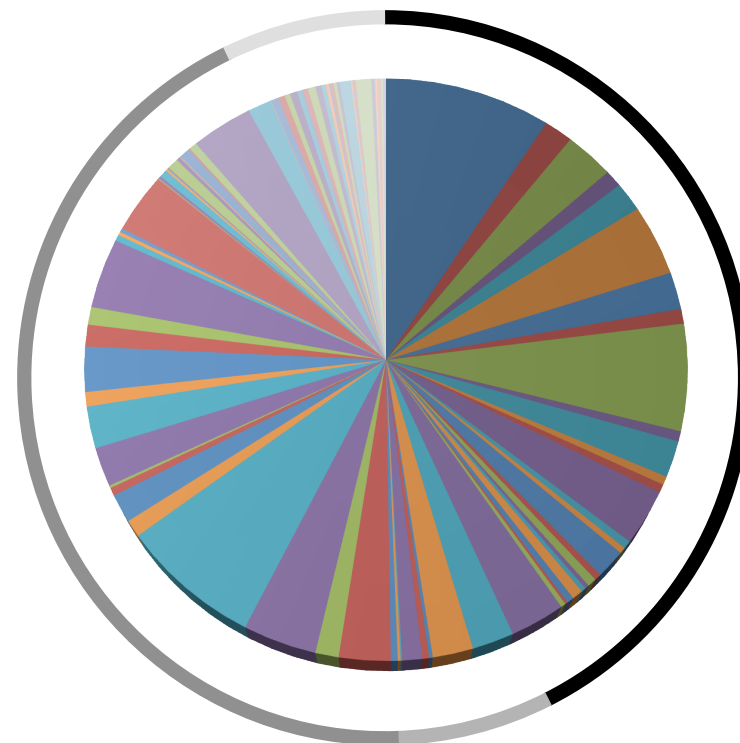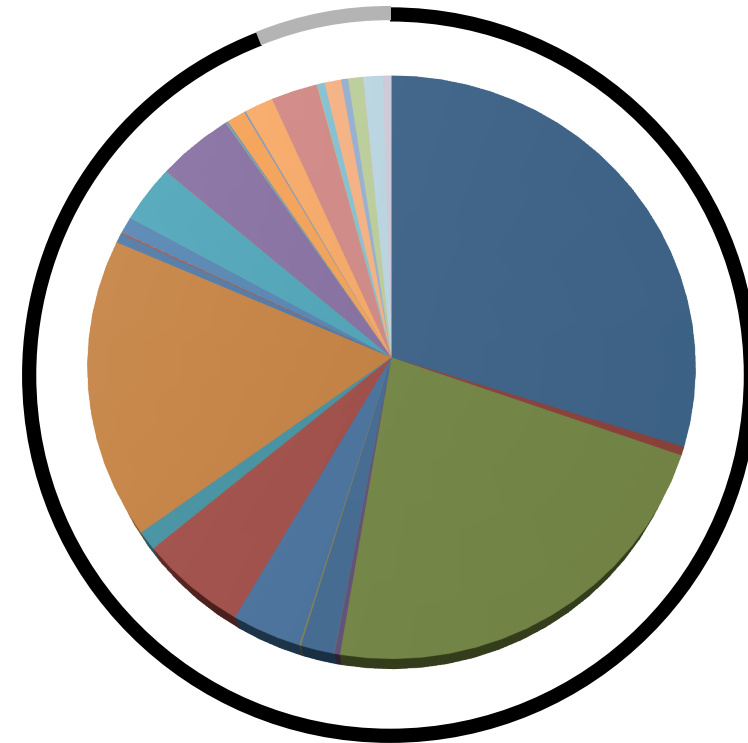

■ Actinobacteria    ■ Bacteroidetes  
■ Proteobacteria    ■ Other

■ Ascomycota    ■ Basidiomycota
