# Supplementary material
Source: PubMed Central journal article supplement (PMC4611511)

Dry Season (% Change)

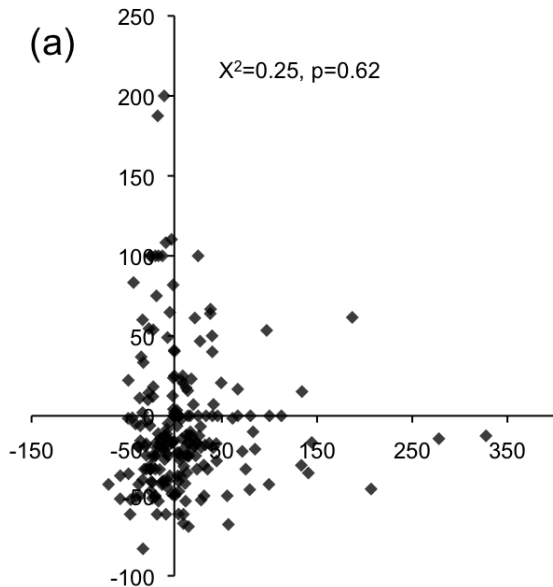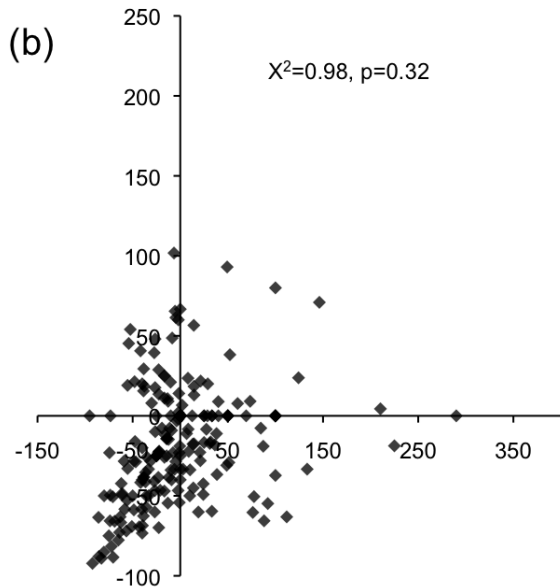

Drought Treatment (% Change)

Supplement: ismej201558x10.pdf [file ismej201558x10.pdf]

Variation Explained (%)

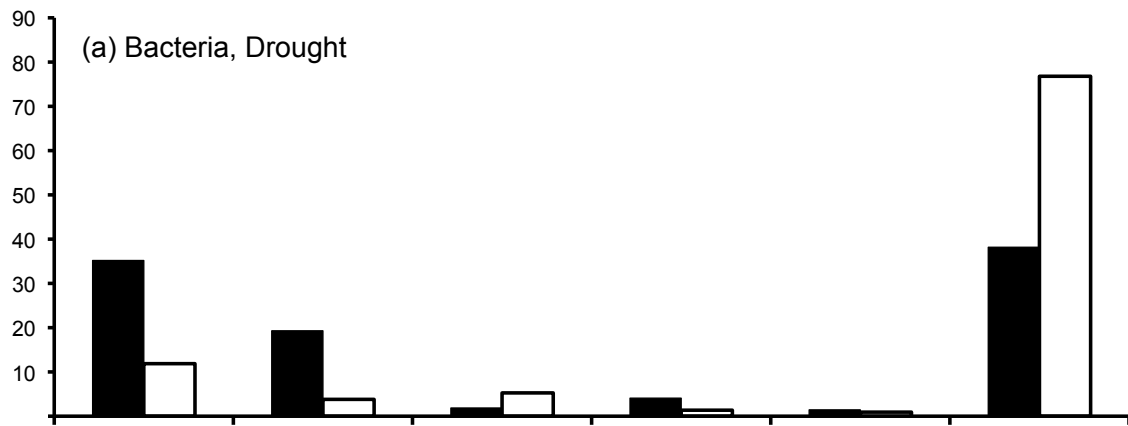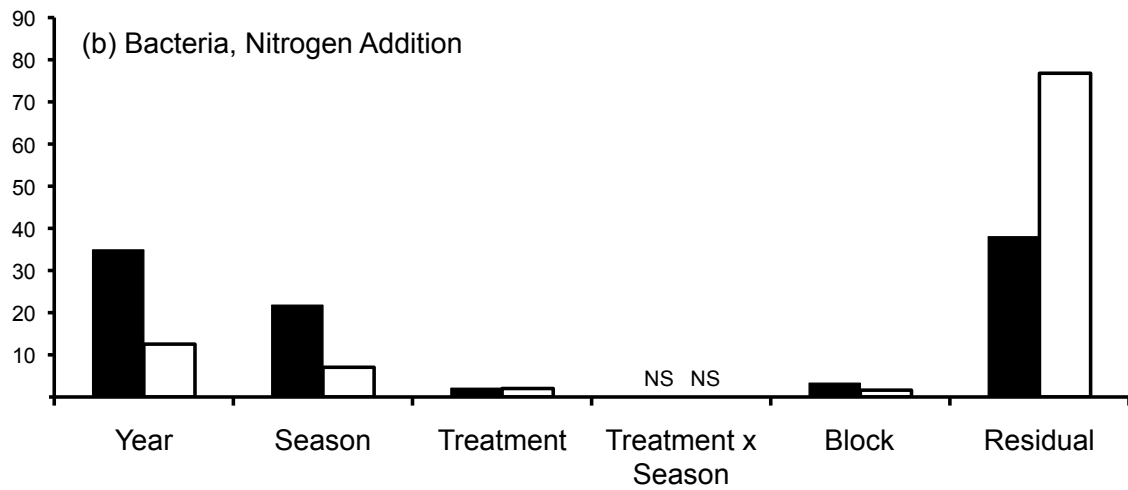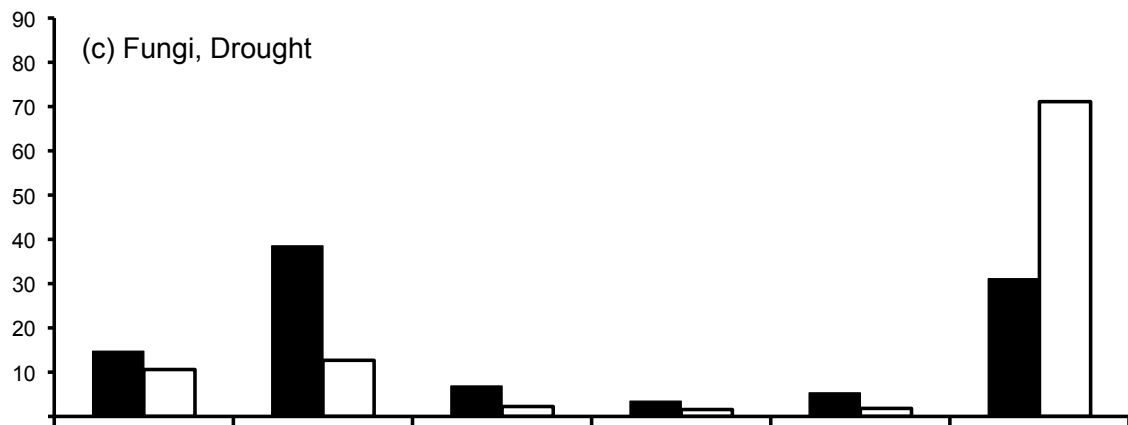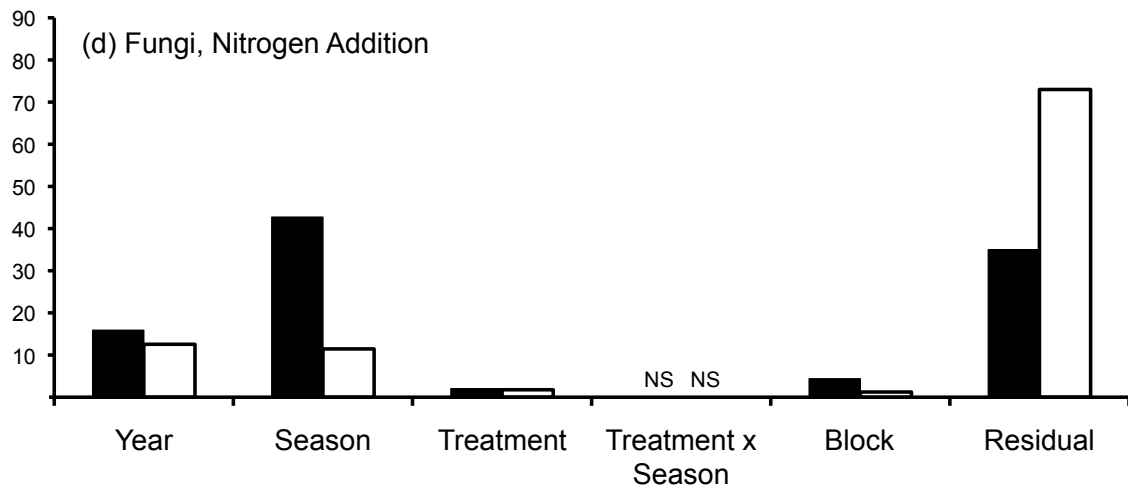

Supplement: ismej201558x11.pdf [file ismej201558x11.pdf]

Megatenome Proportion

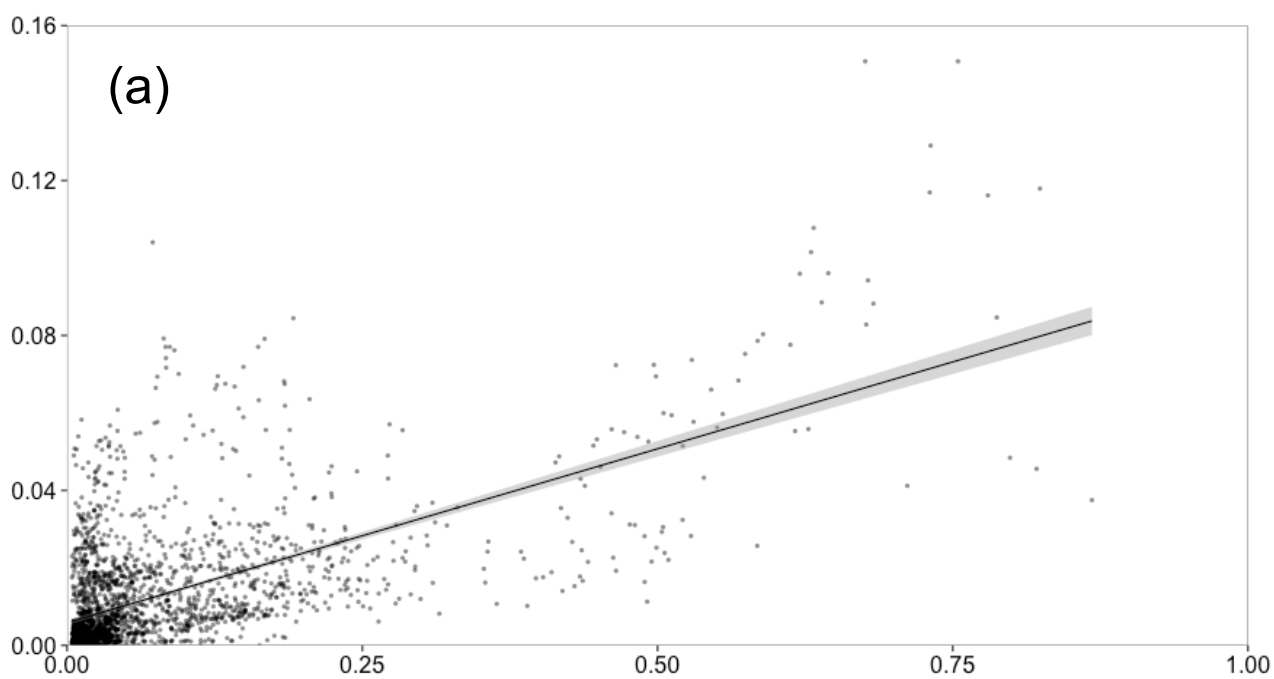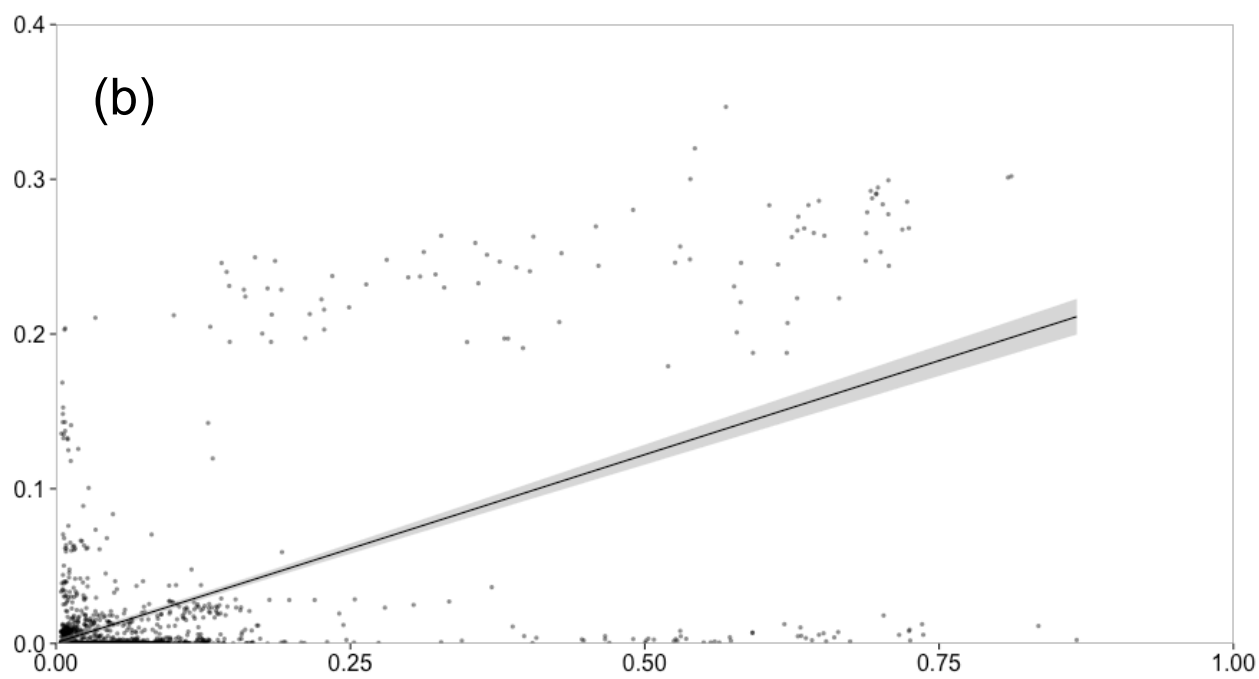

454 Proportion ( $\sqrt{\quad}$ )

Supplement: ismej201558x8.pdf [file ismej201558x8.pdf]

Figure S3.

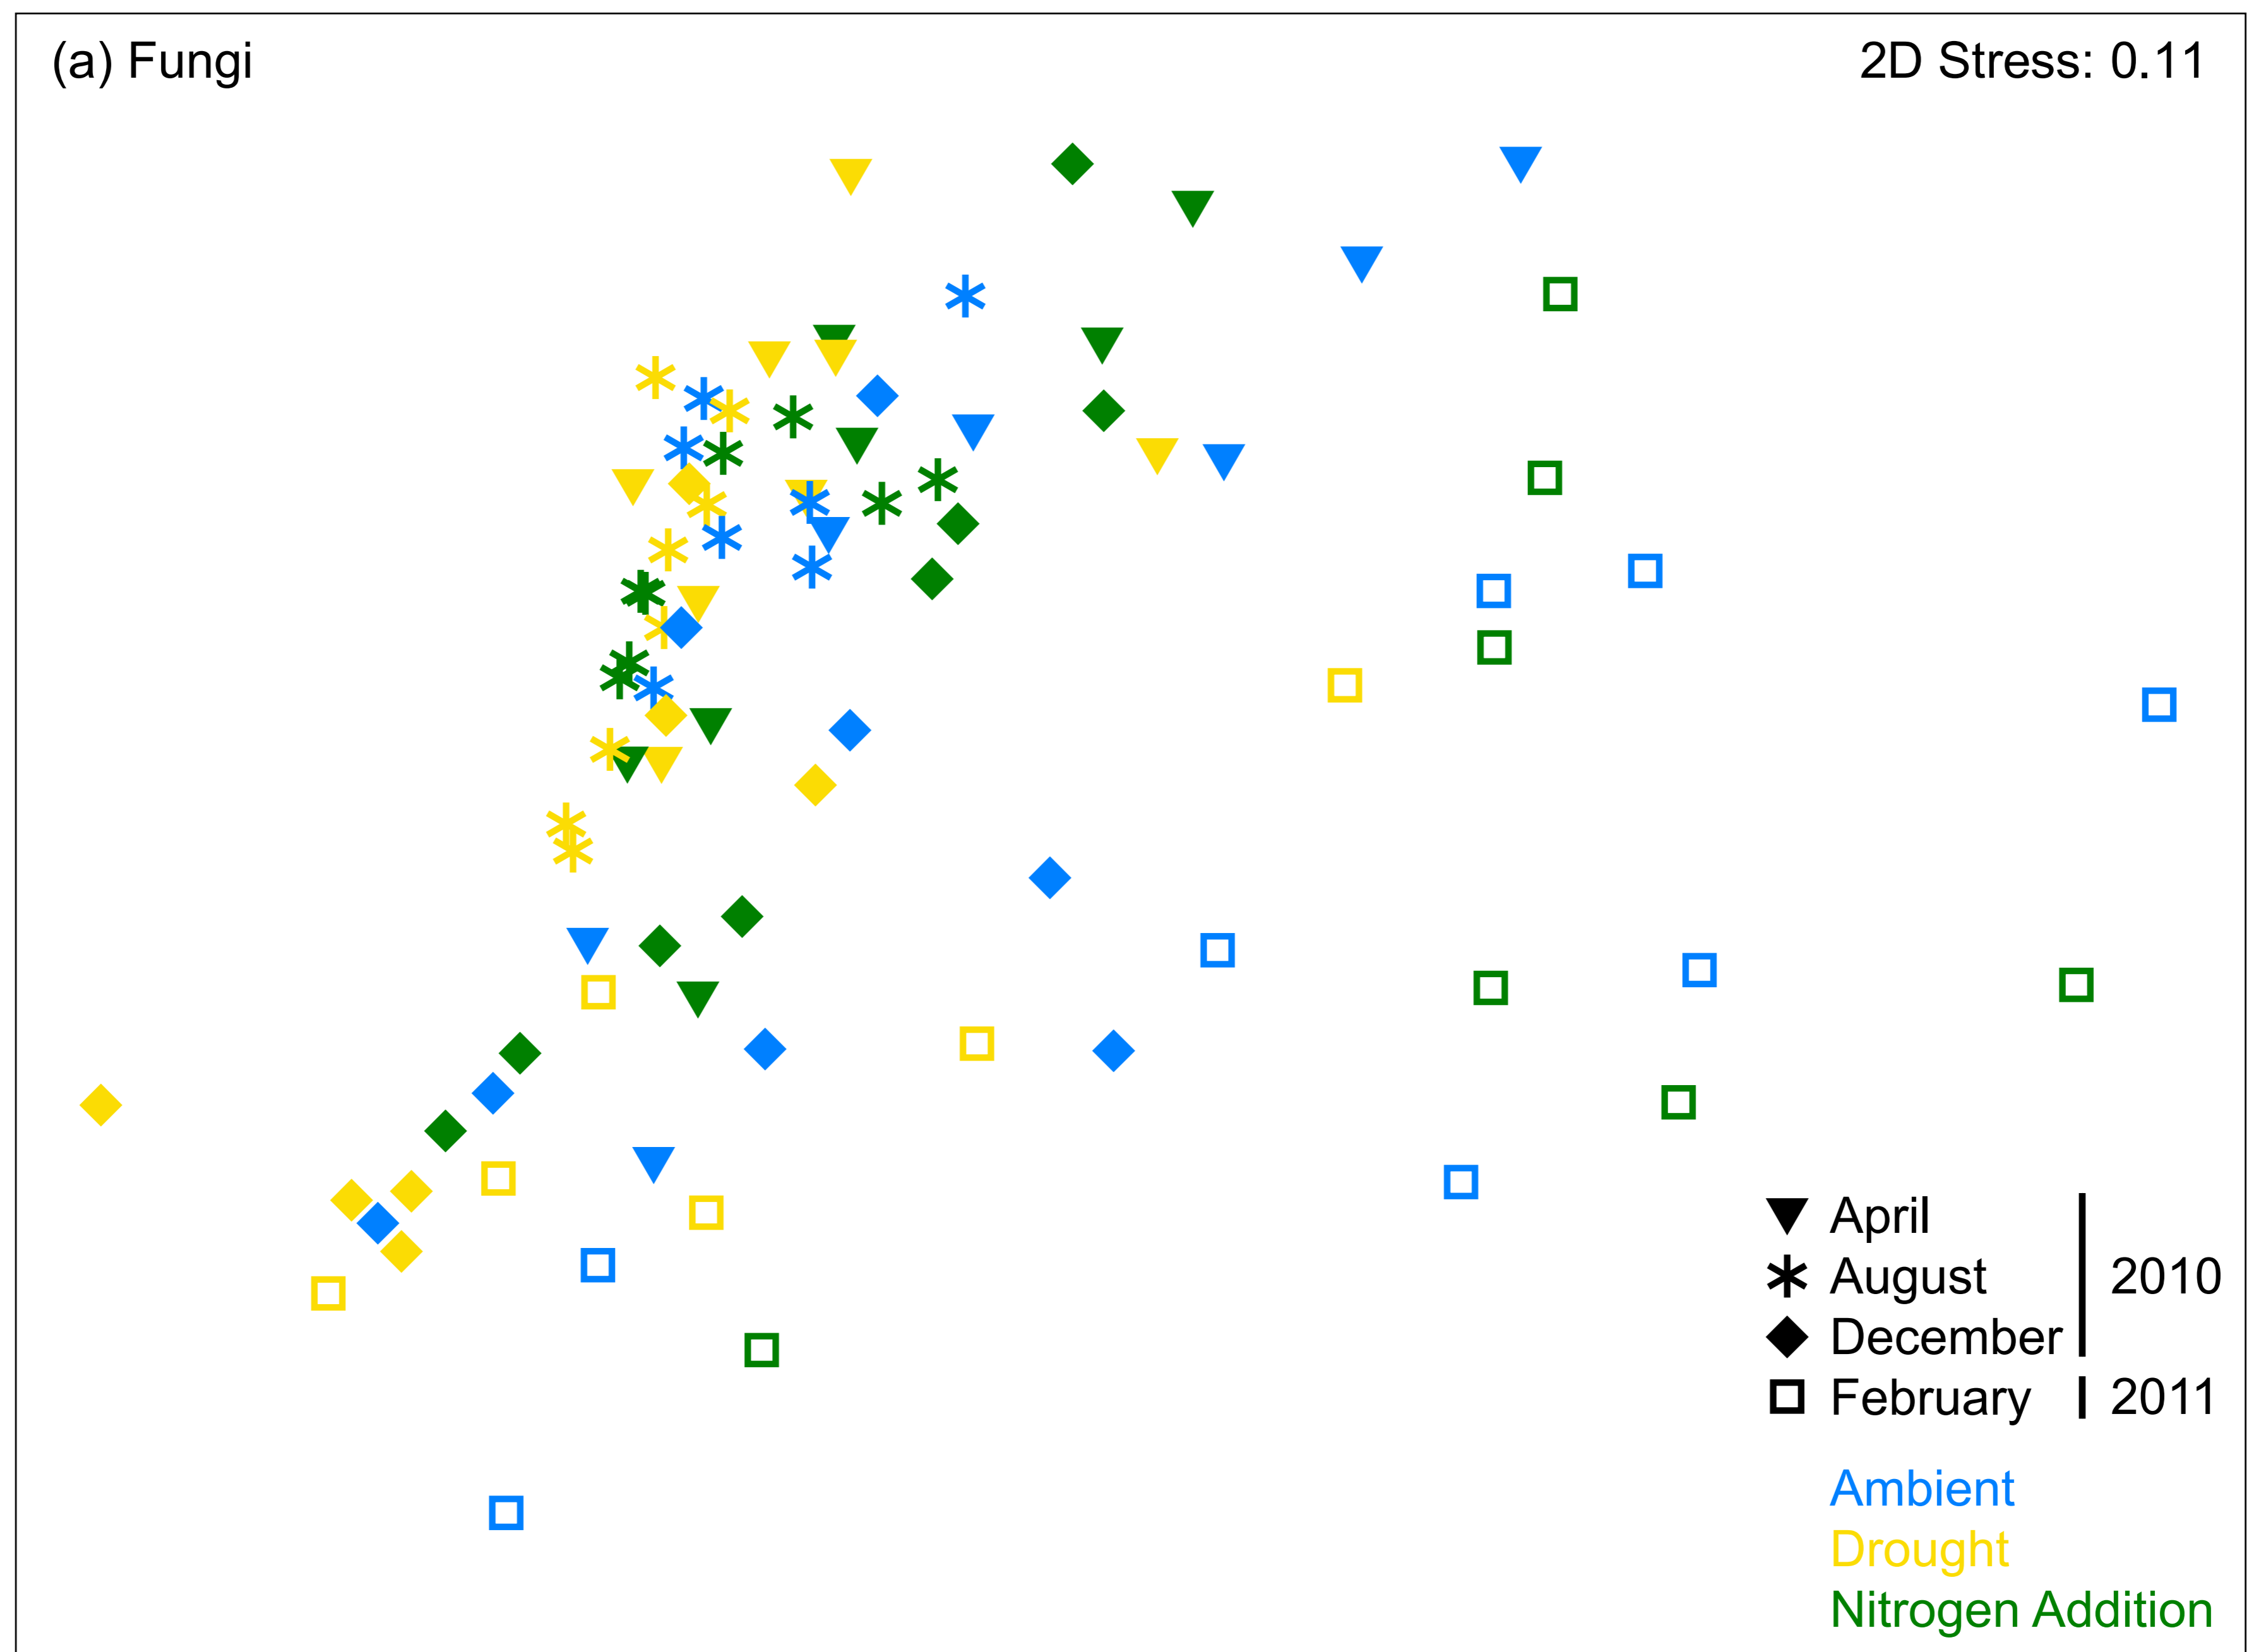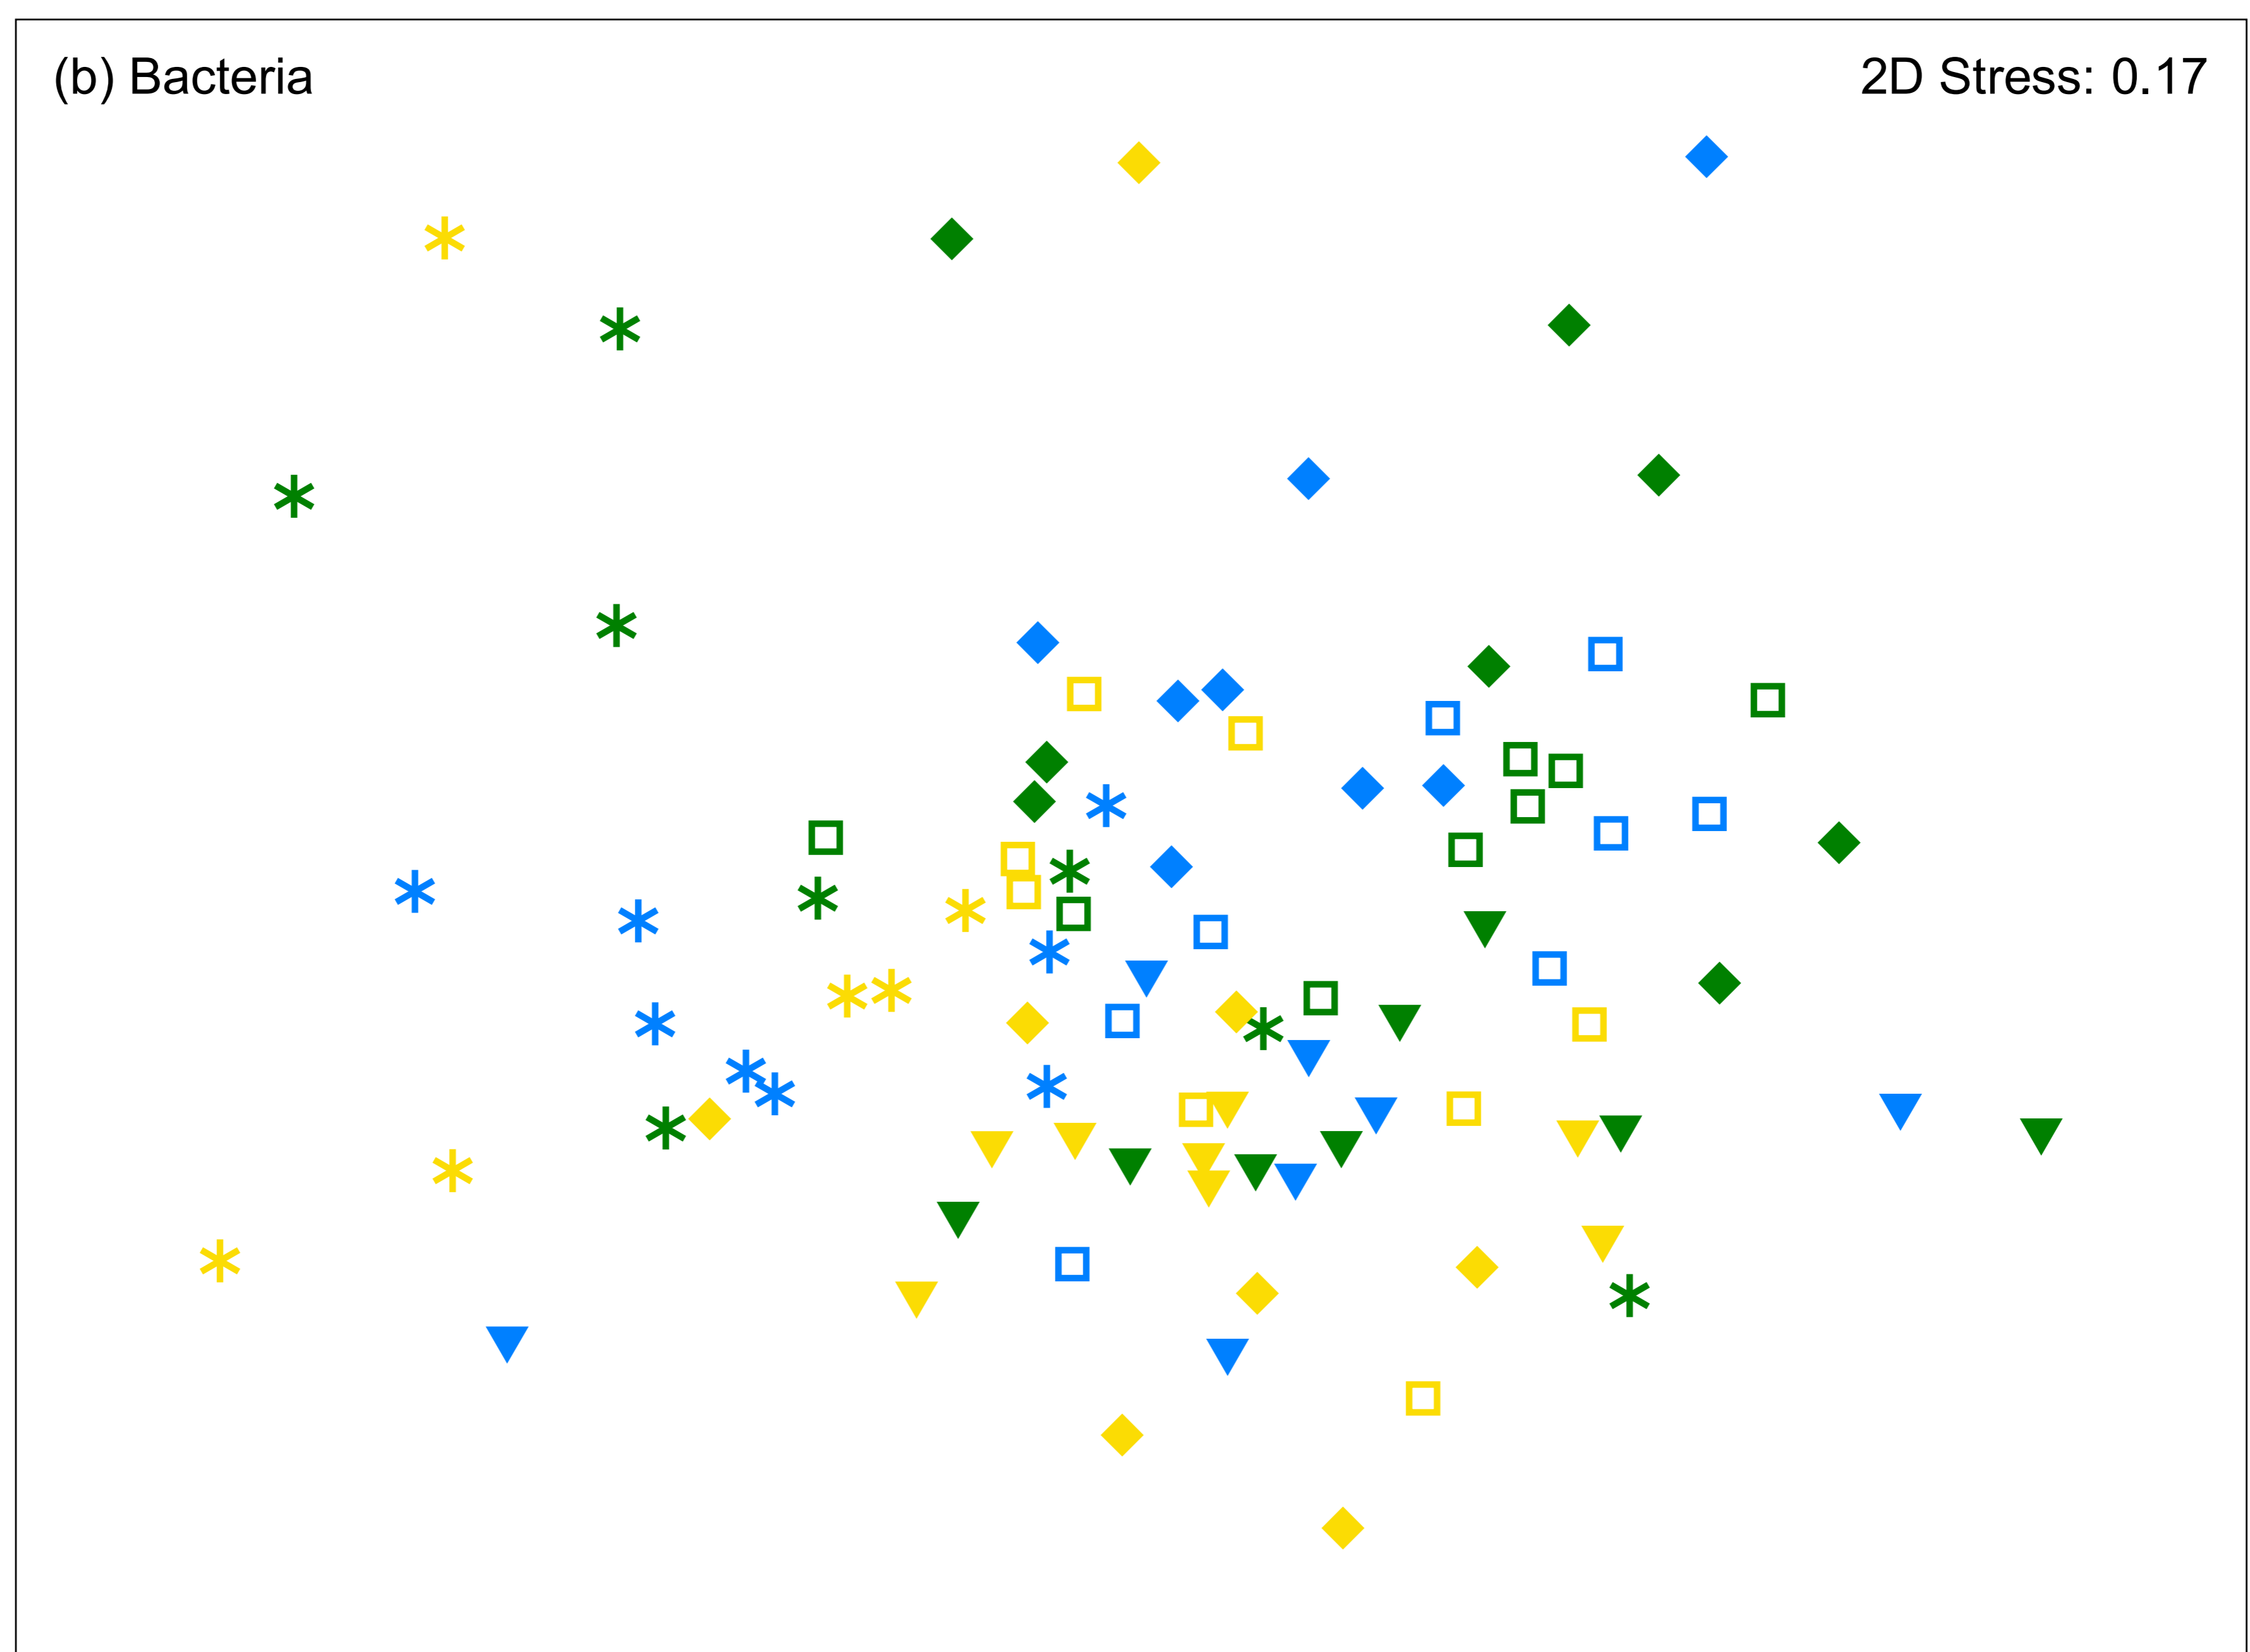

Supplement: ismej201558x9.pdf [file ismej201558x9.pdf]
